# Supplementary material for: MTHFD2 promotes tumorigenesis and metastasis in lung adenocarcinoma by regulating AKT/GSK‐3β/β‐catenin signalling
Source: PubMed Central journal article supplement (PMC8278097; doi:10.1111/jcmm.16715), 2021-06-13
Supplement: JCMM-25-7013-s003.pdf [file JCMM-25-7013-s003.pdf]

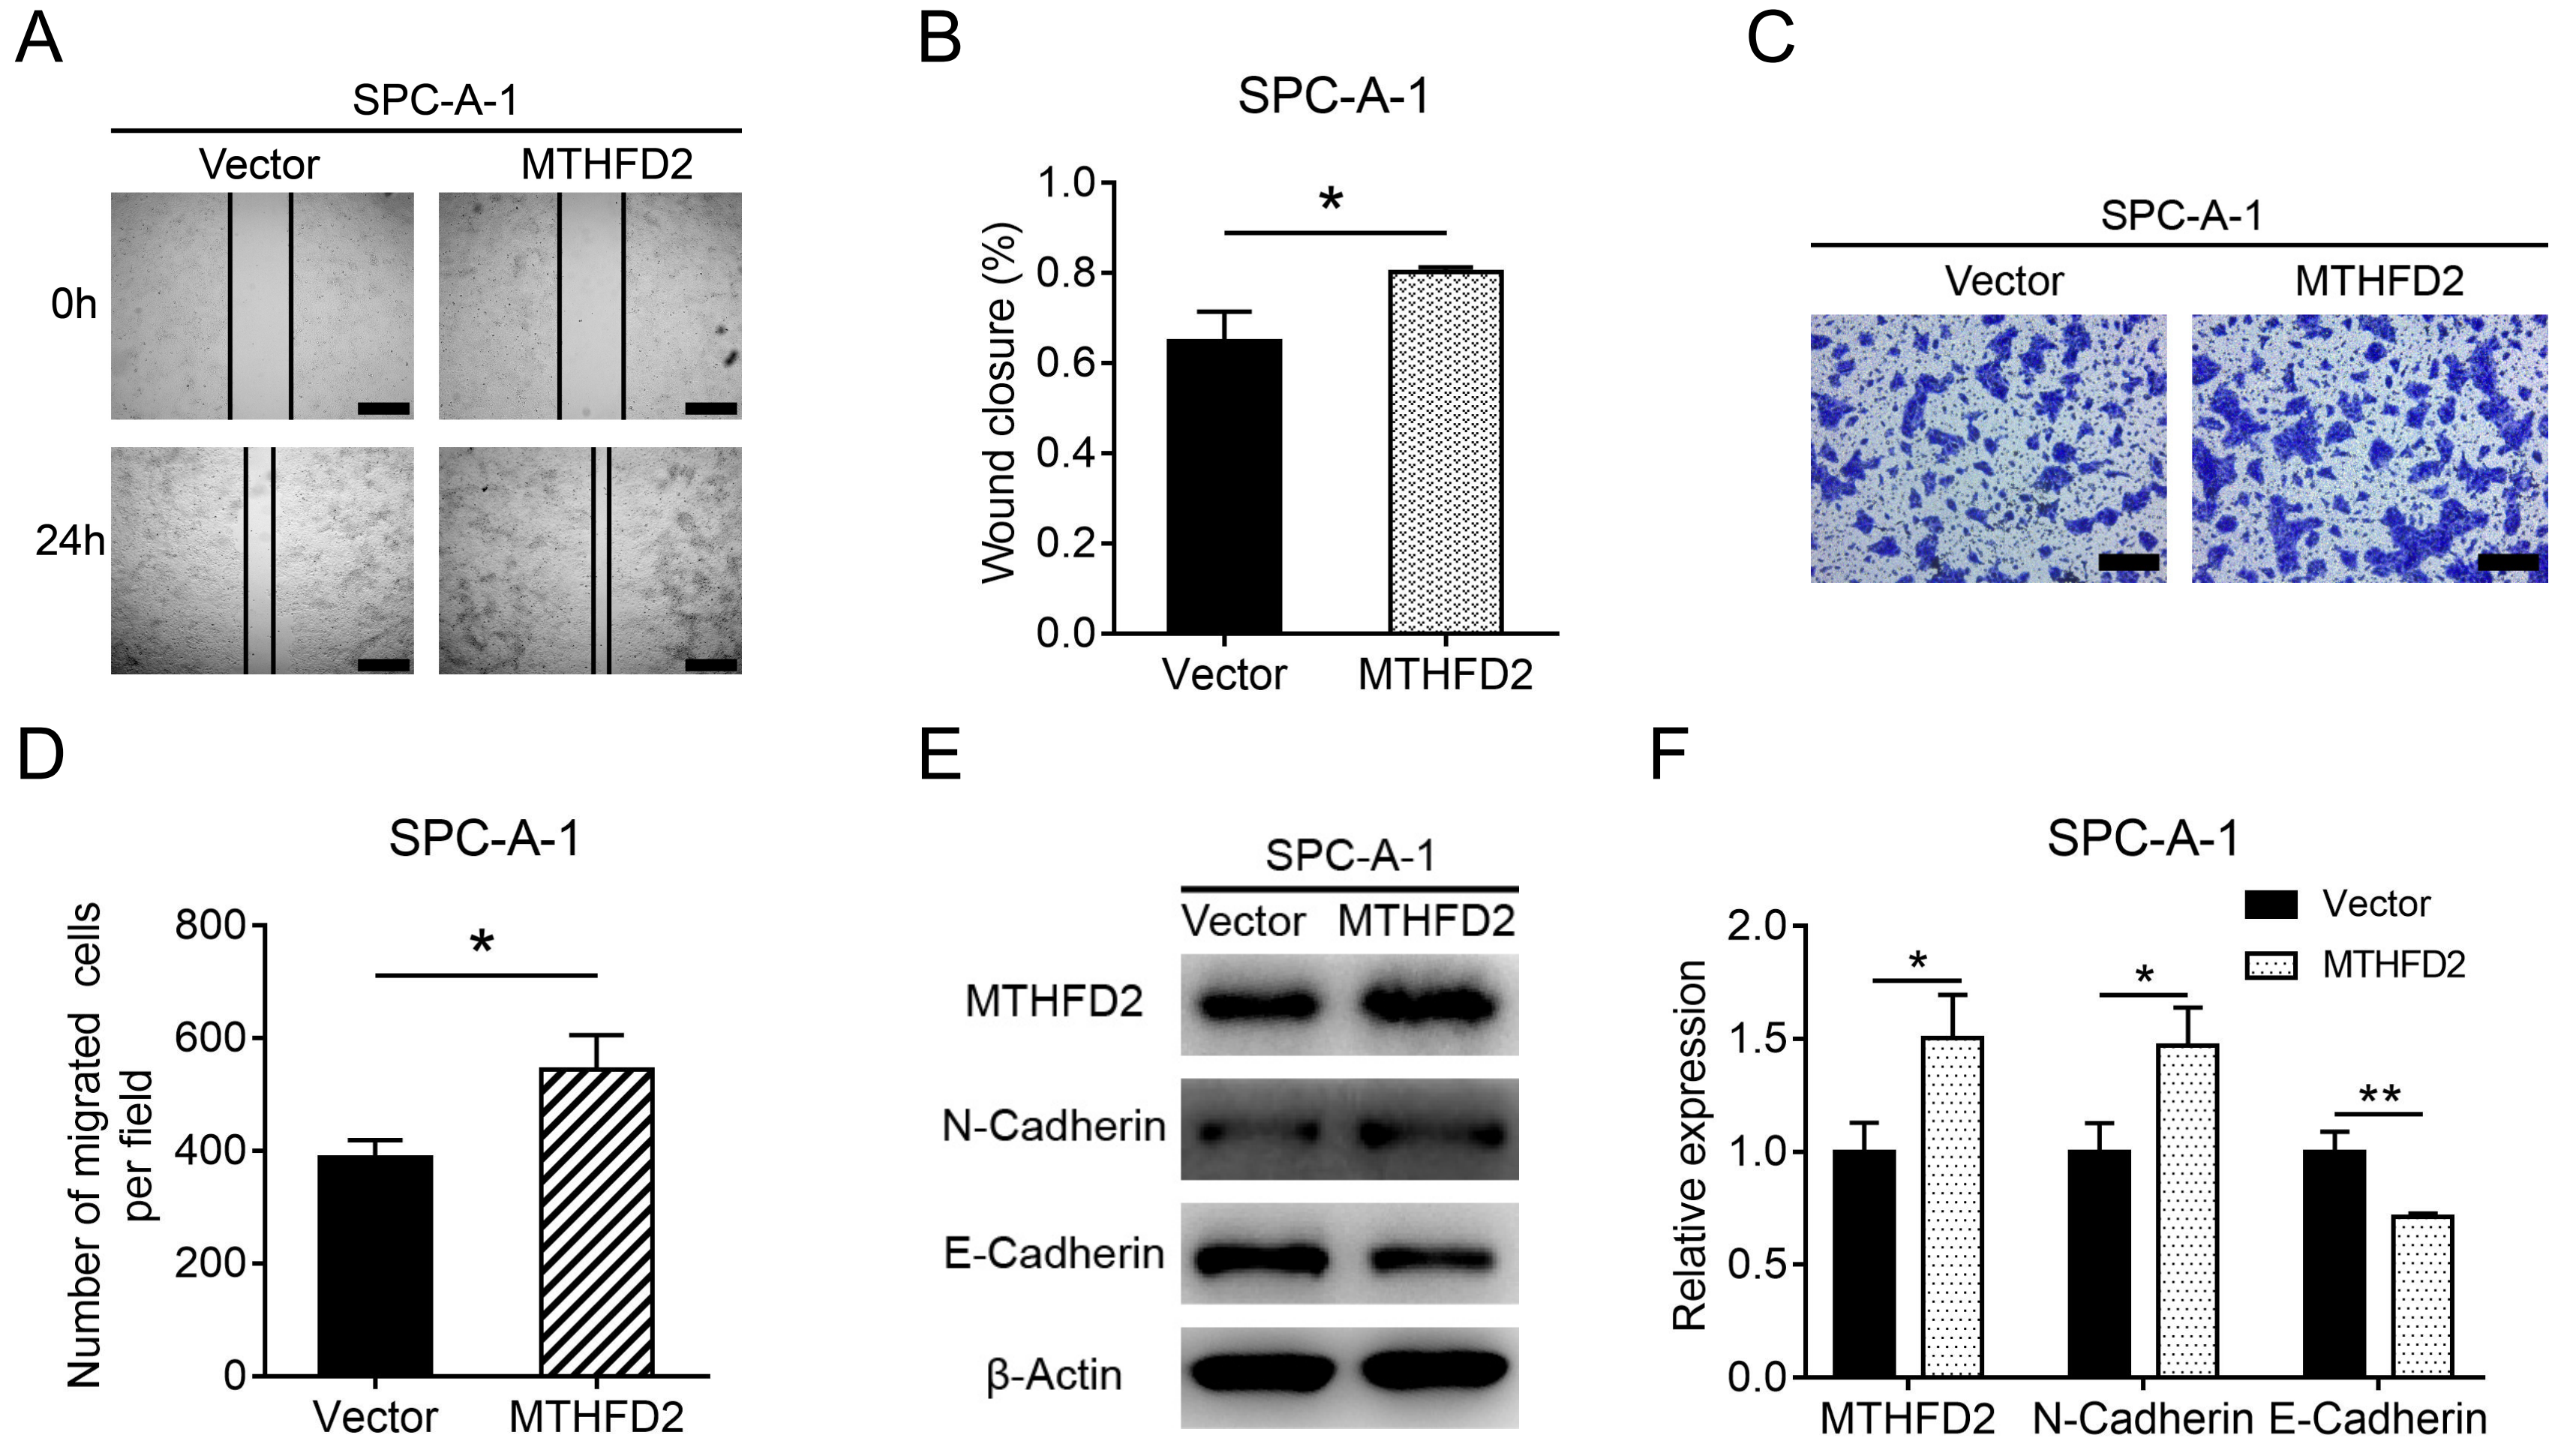

FIGURE S2
